# Supplementary material
Source: PubMed Central journal article supplement (PMC10603819)
Supplement: NIHMS1574157-supplement-6.pdf [file NIHMS1574157-supplement-6.pdf]

**Supplemental Table S1: Endocrine-related pathways associated with all five pesticides (p<0.01)**

| <b>Endocrine-Mediated Pathway</b>      | <b>Examples of genes affected by OCPs</b>                                                                                                                                                                                                           |
|----------------------------------------|-----------------------------------------------------------------------------------------------------------------------------------------------------------------------------------------------------------------------------------------------------|
| Androgen biosynthesis                  | CGA   HSD17B12   HSD3B1   LHB   POMC CGA   CYP17A1   HSD17B3   HSD3B1   LHB                                                                                                                                                                         |
| Endocrine resistance                   | ADCY4   AKT1   AKT2   BAD   BAX   BCL2   CCND1   CDK4   CDKN1A   CDKN2A   CYP2D6   EGFR   ESR1   ESR2   FOS   GNAS   HBEGF   HRAS   IGF1   IGF1R   MAPK1   MAPK10   MAPK3   MAPK8   MED1   NCOR1   NRAS   PIK3R1                                    |
| Estrogen signaling pathway             | ADCY4   AKT1   AKT2   CREB1   EGFR   ESR1   ESR2   FOS   GNAI3   GNAO1   GNAS   HBEGF   HRAS   HSP90AA1   HSP90B1   HSPA1A   ITPR3   MAPK1   MAPK3   NRAS   PIK3R1                                                                                  |
| GnRH signaling pathway                 | ADCY4   CGA   EGFR   FSHB   GNAS   GNRH1   HBEGF   HRAS   ITPR3   LHB   MAP3K3   MAPK1   MAPK10   MAPK3   MAPK8   MMP14   NRAS   PRKCA   PRKCB                                                                                                      |
| Hormone ligand-binding receptors       | CGA   FSHB   FSHR   GNRH1   LHB   LHCGR   TSHB                                                                                                                                                                                                      |
| IGF1R signaling cascade                | AKT1   AKT2   ANGPT1   ARRB1   DLG4   DUSP1   EGFR   EIF4E   FGB   FGF2   FYN   GRIN1   HBEGF   HRAS   IL2   IL5   INSR   IRS1   JAK1   KSR1   MAPK1   MAPK3   NRAS   PDGFA   PDGFB   PHB   PIK3R1   PSMA2   PSMA3   PSMB1   PSMB8   PSMD5   PTPN11 |
| Insulin receptor signalling cascade    | AKT1   AKT2   ANGPT1   ARRB1   DLG4   DUSP1   EGFR   EIF4E   FGB   FGF2   FYN   GRIN1   HBEGF   HRAS   IL2   IL5   INSR   IRS1   JAK1   KSR1   MAPK1   MAPK3   NRAS   PDGFA   PDGFB   PHB   PIK3R1   PSMA2   PSMA3   PSMB1   PSMB8   PSMD5   PTPN11 |
| Insulin signaling pathway              | AKT2   ARAF   CALM2   CRK   ELK1   FLOT1   HK2   INS   MAP2K1   MAP2K2   MAPK1   MAPK10   MAPK3   MTOR   PIK3R2   PRKAB1   PYGM   RAF1   TSC1   TSC2                                                                                                |
| Nuclear Receptor transcription pathway | AR   ESR1   ESR2   MED1   NR1H4   NR1I2   NR1I3   NR3C1   NR3C2   NR4A1   NR4A2   NR5A1   PGR   PPARG   RXRA   RXRB   THRA   THRB                                                                                                                   |
| Ovarian steroidogenesis                | ADCY4   CGA   CYP11A1   CYP17A1   CYP19A1   CYP1A1   CYP1B1   FSHB   FSHR   GNAS   HSD17B1   HSD17B2   HSD17B7   HSD3B1   IGF1   IGF1R   INSR   LHB   LHCGR   SCARB1   STAR                                                                         |
| Oxytocin signaling pathway             | ACTB   CALM2   CAMK2A   CAMK2B   CAMK2G   CCND1   CDKN1A   EGFR   ELK1   FOS   JUN   MAP2K1   MAP2K2   MAPK1   MAPK3   MYLK   PLCB1   PPP3R1   PRKAB1   RAF1   RGS2   SRC                                                                           |
| Peptide hormone metabolism             | ACE   CGA   CMA1   CTNNB1   EXOC4   FSHB   GRP   IGF1   KIF5A   KIF5B   LHB   RAB27A   REN   TSHB                                                                                                                                                   |
| Prolactin signaling pathway            | AKT1   AKT2   CCND1   CCND2   CGA   CSN2   CYP17A1   ESR1   ESR2   FOS   FOXO3   HRAS   LHB   LHCGR   MAPK1   MAPK10   MAPK3   MAPK8   NRAS   PIK3R1   PRL   PRLR   RELA   SLC2A2   SOCS3   STAT3   TH                                              |
| Signaling by Insulin receptor          | AKT2   ARAF   ARRB2   CALM2   CAMK2A   CAMK2B   CAMK2G   DUSP1   EGFR   EIF4G1   ERBB3   FGB   FGF1   FGF17   FGF2   FGF22   FGF9   FGFR1   FGFR4   FYN   GFR A1   GRIN1   GRIN2B   GRIN2C   INS   IQGAP1   ITGA2B   KIT   MAP2K1   MAP2K2   M      |
| Signaling by Leptin                    | CAMK2B   CAMK2G   DLG4   EGF   EGFR   ERBB2   ERBB3   ERBB4   FGFR4   FN1   FYN   GDNF   GFRA1   GFRA4   GRIN1   GRIN2B   IRS2   KIT   LEP   MAPK1   MAPK3   NF1   NRG1   PDGFRA   PDGFRB   RET   SPTBN2   STAT3   STAT5B   SYNGAP1                 |
| Steroid hormone biosynthesis           | AKR1C2   CYP11A1   CYP17A1   CYP19A1   CYP1A1   CYP1A2   CYP1B1   CYP3A4   CYP7A1   CYP7B1   HSD17B1   HSD3B1   SULT1E1                                                                                                                             |
| Thyroid hormone signaling pathway      | ACTB   ATP1A1   BAD   CASP9   CCND1   CREBBP   CTNNB1   ESR1   GSK3B   MAPK1   MAPK3   MDM2   MYC   MYH6   NCOA1   NOTCH1   PRKACA   RXRB   SLC9A1   STAT1   TP53                                                                                   |
| Thyroid hormone synthesis              | ALB   ATF4   ATP1A1   CGA   CREB1   GPX2   GSR   HSPA5   PRKACA   TSHR   TTR                                                                                                                                                                        |
